# Supplementary material for: Cortex-wide BOLD fMRI activity reflects locally-recorded slow oscillation-associated calcium waves
Source: eLife journal article supplement (doi:10.7554/elife.27602), 2017-09-15
Supplement: supp [file elife-27602-supp-v2.zip]

Archive with 21 entries (21 files):
- elife_poa_e27602_Figure_3_Supplement_2.pdf
- elife_poa_e27602_Transparent_Reporting_File.docx
- elife_poa_e27602_Figure_6_Supplement_3.pdf
- elife_poa_e27602_Figure_1_Supplement_1.pdf
- elife_poa_e27602_Figure_3_Supplement_3.pdf
- elife_poa_e27602_Figure_2_Supplement_1.pdf
- elife_poa_e27602_Figure_5_Supplement_2.pdf
- elife_poa_e27602_Figure_1_source_data_1.xlsx
- elife_poa_e27602_Figure_6_Source_Data_1.docx
- elife_poa_e27602_Figure_6_Supplement_2.pdf
- elife_poa_e27602_Figure_5_Supplement_3.pdf
- elife_poa_e27602_Figure_2_Supplement_3.pdf
- elife_poa_e27602_Figure_3_Supplement_1.pdf
- elife_poa_e27602_Figure_5_Supplement_4.pdf
- elife_poa_e27602_Figure_3_Source_Data_1.docx
- elife_poa_e27602_Figure_5_Supplement_1.pdf
- elife_poa_e27602_Figure_1_Source_data_2.xlsx
- elife_poa_e27602_Figure_6_Source_Data_2.docx
- elife_poa_e27602_Source_Code_File.zip
- elife_poa_e27602_Figure_2_Supplement_2.pdf
- elife_poa_e27602_Figure_6_Supplement_1.pdf
