# Supplementary material for: Cortex-wide BOLD fMRI activity reflects locally-recorded slow oscillation-associated calcium waves
Source: eLife journal article supplement (doi:10.7554/elife.27602), 2017-09-15
Supplement: supp [file elife-27602-supp-v2.zip › elife_poa_e27602_Figure_1_source_data_1.xlsx]

## Sheet: Sheet1
animal	event at timepoint	Amplitude_Ay	Amplitude_By	Amplitude_dy	Amplitude_percent_dy	risetime_dx	risetime_ms_dx	Duration_Ax	Duration_Bx	Duration_dx	Duration_ms_dx
1998	75	0.010829	0.04352	0.032695	3.2695	0.068	68	74.667	75.927	1.26	1260
1998	88	0.013591	0.051388	0.037797	3.7797	0.0415	41.5	88.657	87.815	0.8415	841.5
1998	62	0.0098133	0.04318	0.033366	3.3366	0.032	32	62.432	61.541	0.891	891
1998	68	0.042741	0.010925	0.031817	3.1817	0.019	19	68.129	68.899	0.7695	769.5
2210	82	0.0024857	0.021893	0.019408	1.9408	0.0525	52.5	83.431	82.274	1.1575	1157.5
2209	71	0.0038696	0.027274	0.023405	2.3405	0.0185	18.5	73.378	71.165	2.2135	2213.5
2209	72	0.003895	0.024181	0.020286	2.0286	0.0145	14.5	72.844	71.456	1.3875	1387.5
2209	143	0.0028383	0.032719	0.029881	2.9881	0.017	17	141.87	141.11	0.7645	764.5
2839	50	0.22593	0.24251	0.016587	1.6587	0.0835	83.5	50.937	49.692	1.245	1245
2839	337	0.0049378	0.044184	0.039246	3.9246	0.108	108	337.85	336.54	1.3145	1314.5
2839	355	0.003703	0.028557	0.024854	2.4854	0.086	86	355.63	354.39	1.2405	1240.5
2839	360	0.0286198	0.0049098	0.023709	2.3709	0.081	81	359.44	360.53	1.0945	1094.5
2839	451	0.011013	0.043092	0.032078	3.2078	0.056	56	452.68	451.03	1.6485	1648.5
2839	574	0.010539	0.034051	0.023512	2.3512	0.026	26	574.68	573.78	0.8995	899.5
2839	602	0.014717	0.042044	0.027327	2.7327	0.031	31	602.94	601.65	1.2875	1287.5
2839	19	0.010747	0.04434	0.033593	3.3593	0.069	69	19.07	20.226	1.555	1555
2839	42	0.0076966	0.029405	0.037102	3.7102	0.047	47	43.104	42.142	0.9615	961.5
2839	57	0.013114	0.022454	0.035568	3.5568	0.107	107	58.375	56.386	1.9895	1989.5
2927	95	0.0012786	0.020911	0.019632	1.9632	0.0655	65.5	95.599	94.486	1.113	1113
2927	102	0.019021	0.0011045	0.017917	1.7917	0.099	99	102.12	103.92	1.7965	1796.5
2927	106	0.0018134	0.024786	0.022972	2.2972	0.088	88	106.96	105.49	1.4675	1467.5
2927	67	0.0016044	0.015378	0.016982	1.6982	0.062	62	67.668	66.584	1.0845	1084.5
2927	77	0.023367	0.0035624	0.019805	1.9805	0.1495	149.5	76.7	78.296	1.5965	1596.5
2927	90	0.0027894	0.017553	0.014763	1.4763	0.0925	92.5	90.115	89.092	1.0235	1023.5
2927	100	0.020114	0.0020938	0.01802	1.802	0.029	29	98.963	101.59	2.629	2629
2927	45	0.0018446	0.029041	0.027196	2.7196	0.013066	13.066	46.355	44.605	1.7505	1750.5
2927	65	0.0015449	0.021795	0.02025	2.025	0.0445	44.5	66.832	64.812	2.0205	2020.5
2927	30	0.0034122	0.033044	0.029632	2.9632	0.112	112	30.23	29.173	1.0565	1056.5
2927	66	0.020365	0.001196	0.019169	1.9169	0.417	417	66.169	65.349	0.821	821
2927	206	0.0017791	0.01869	0.016911	1.6911	0.0345	34.5	207.92	206.12	1.8	1800
					2.5516
