# Supplementary material for: Cortex-wide BOLD fMRI activity reflects locally-recorded slow oscillation-associated calcium waves
Source: eLife journal article supplement (doi:10.7554/elife.27602), 2017-09-15
Supplement: supp [file elife-27602-supp-v2.zip › elife_poa_e27602_Figure_1_Source_data_2.xlsx]

## Sheet: Sheet1
animal	event at timpeoint	Amplitude_Ay	Amplitude_By	Amplitude_dy	Amplitude_percent_dy	risetime_dx	risetime_ms_dx	Duration_Ax	Duration_Bx	Duration_dx	Duration_ms_dx
5003	60	0.0062362	0.022825	0.016589	1.6589	0.222	222	61.7333	59.102	2.6315	2631.5
5003	100	0.00064252	0.014243	0.013601	1.3601	0.1955	195.5	100.39	97.954	2.4345	2434.5
5003	210	0.010073	0.00011449	0.010188	1.0188	0.28	280	2010.29	208.16	2.1315	2131.5
5003	211	0.0095333	0.0034756	0.013009	1.3009	0.06	60	266.75	264.59	2.1525	2152.5
5003	280	0.0024857	0.021893	0.019408	1.9408	0.4325	432.5	247.99	250.69	2.703	2703
5003	250	0.033338	0.054146	0.020808	2.0808	0.132	132	291.47	289.88	1.593	1593
5003	310	0.01372	0.0031624	0.010557	1.0557	0.0955	95.5	309.18	908.16	1.0175	1017.5
5003	330	0.014291	0.0044672	0.010053	1.0053	0.115	115	332.72	331.75	0.976	976
5003	1080	0.20536	0.20832	0.013264	1.3264	0.1325	132.5	1083.7	1082.8	0.9615	961.5
5003	1090	0.20832	0.20518	0.013695	1.3695	0.1835	183.5	1090.8	1090	0.844	844
5003	1285	0.048227	0.035666	0.024854	2.4854	0.0575	57.5	1288.2	1287.1	1.1035	1103.5
5003	1820	0.052957	0.036467	0.01649	1.649	0.281	281	1824.3	1823	1.3105	1310.5
5004	1726	0.0057139	0.031083	0.025369	2.5369	0.075	75	1725.9	1726.8	0.8835	883.5
5004	1790	0.0032265	0.046985	0.043759	4.3759	0.1	100	1790.4	1791.3	0.9605	960.5
5004	1736	0.011958	0.039802	0.027844	2.7844	0.099	99	1735.9	1736.9	1.068	1068
5004	687	0.11079	0.12308	0.012281	1.2281	0.0235	23.5	687.05	688.41	1.3565	1356.5
5004	1662	0.0093452	0.071174	0.061828	6.1828	0.1205	120.5	1662.2	1663.4	1.1725	1172.5
5004	1810	0.0036962	0.057351	0.053655	5.3655	0.198	198	1810.7	1811.9	1.26	1260
5004	1086	0.12477	0.11092	0.01385	1.385	0.137	137	1096.2	1097.6	1.3735	1373.5
5004	1738	0.0081844	0.044591	0.036407	3.6407	0.122	122	1737.6	1739	1.386	1386
5004	1720	0.0085187	0.056606	0.048087	4.8087	0.1025	102.5	1720	1721.3	1.278	1278
5004	1788	0.00018068	0.040232	0.040413	4.0413	0.125	125	1787.2	1788.4	1.222	1222
5004	1360	0.11033	0.12519	0.014864	1.4864	0.2055	205.5	1360.2	1361.2	0.925	925
5004	1412	0.10944	0.12331	0.013867	1.3867	0.2065	206.5	1412.7	1411.8	0.951	951
5004	1624	0.004723	0.046479	0.041756	4.1756	0.098	98	1623.7	1625	1.291	1291
5004	1628	0.0035267	0.04634	0.042813	4.2813	0.162	162	1627.3	1628.4	1.04	1040
5004	717	0.11055	0.12432	0.013775	1.3775	0.219	219	719.02	717.57	1.4495	1449.5
5003	110	0.02182	0.00017353	0.021651	2.1651	0.148	148	107.14	110.11	2.9695	2969.5
5003	1240	0.019202	0.046644	0.027443	2.7443	0.5505	550.5	1240.7	1243.8	3.1055	3105.5
5003	1480	0.050895	0.034267	0.016628	1.6628	0.2785	278.5	1482.7	1481.2	1.5385	1538.5
