# Supplementary material for: Cortex-wide BOLD fMRI activity reflects locally-recorded slow oscillation-associated calcium waves
Source: eLife journal article supplement (doi:10.7554/elife.27602), 2017-09-15
Supplement: supp [file elife-27602-supp-v2.zip › elife_poa_e27602_Figure_6_Supplement_1.pdf]

Figure 6 Supplement 1

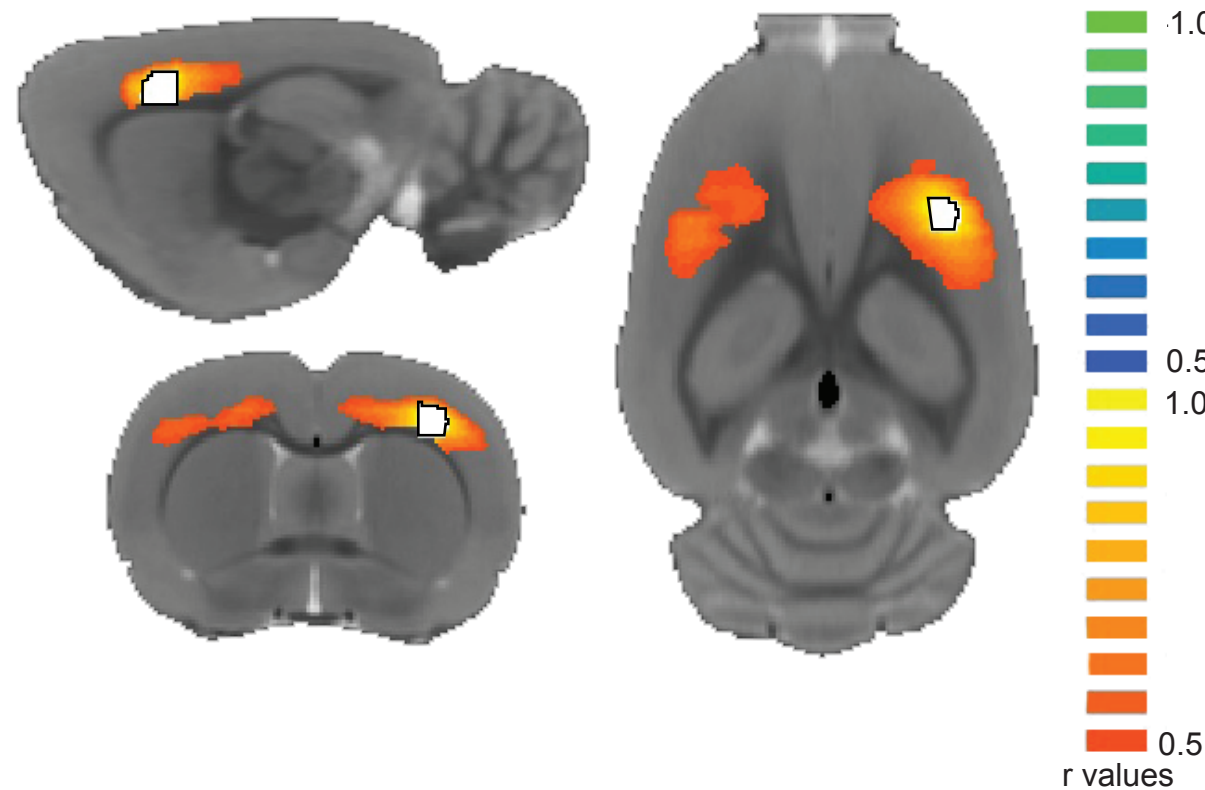

**Figure 6 Supplement 1. Seed-based correlation analysis during persistent activity.** During persistent activity signal correlation between primary somatosensory cortex ROI (white with black outline) and the rest of the cortex does not reveal pan-cortical BOLD activation but shows bilateral somatosensory activity (same animal as in main Figure 6 A).
