# Supplementary material for: Cortex-wide BOLD fMRI activity reflects locally-recorded slow oscillation-associated calcium waves
Source: eLife journal article supplement (doi:10.7554/elife.27602), 2017-09-15
Supplement: supp [file elife_poa_e27602_Figure_1_Supplement_1.pdf › elife_poa_e27602_Figure_1_Supplement_1.pdf]

# Figure 1 Supplement 1

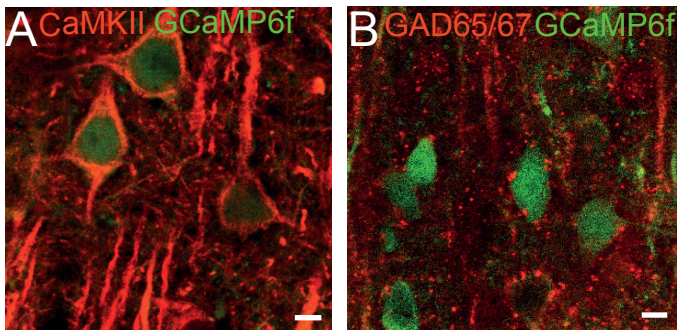

**Figure 1 Supplement 1. Immunofluorescent characterization of GCaMP6f expressing neurons.** (A) Confocal micrograph of GCaMP6f expression under CaMKII promoter co-stained with a CaMKII antibody. (B) Confocal micrograph of GCaMP6f expression under CaMKII promoter co-stained with a GAD 65/67 antibody. (Scale bars= 10  $\mu\text{m}$ )
