# Supplementary material for: Cortex-wide BOLD fMRI activity reflects locally-recorded slow oscillation-associated calcium waves
Source: eLife journal article supplement (doi:10.7554/elife.27602), 2017-09-15
Supplement: supp [file elife_poa_e27602_Figure_2_Supplement_1.pdf › elife_poa_e27602_Figure_2_Supplement_1.pdf]

# Figure 2 Supplement 1

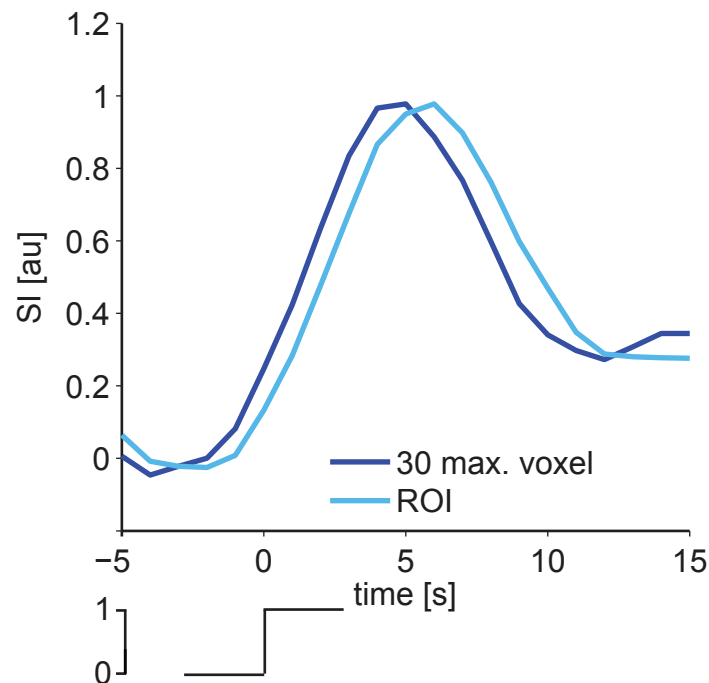

**Figure 2 Supplement 1. Comparison of HR extracted in the 30 most active voxel and in ROI placed in a cortical area.** Timecourses of BOLD responses upon an averaged slow wave onset reveal similar signal dynamics for a ROI defined from the 30 voxel of highest intensity in the previously calculated F-maps (dark blue curve) or a ROI placed in a cortical area showing BOLD activation (light blue curve).
