# Supplementary material for: Cortex-wide BOLD fMRI activity reflects locally-recorded slow oscillation-associated calcium waves
Source: eLife journal article supplement (doi:10.7554/elife.27602), 2017-09-15
Supplement: supp [file elife_poa_e27602_Figure_2_Supplement_2.pdf › elife_poa_e27602_Figure_2_Supplement_2.pdf]

Figure 2 Supplement 2

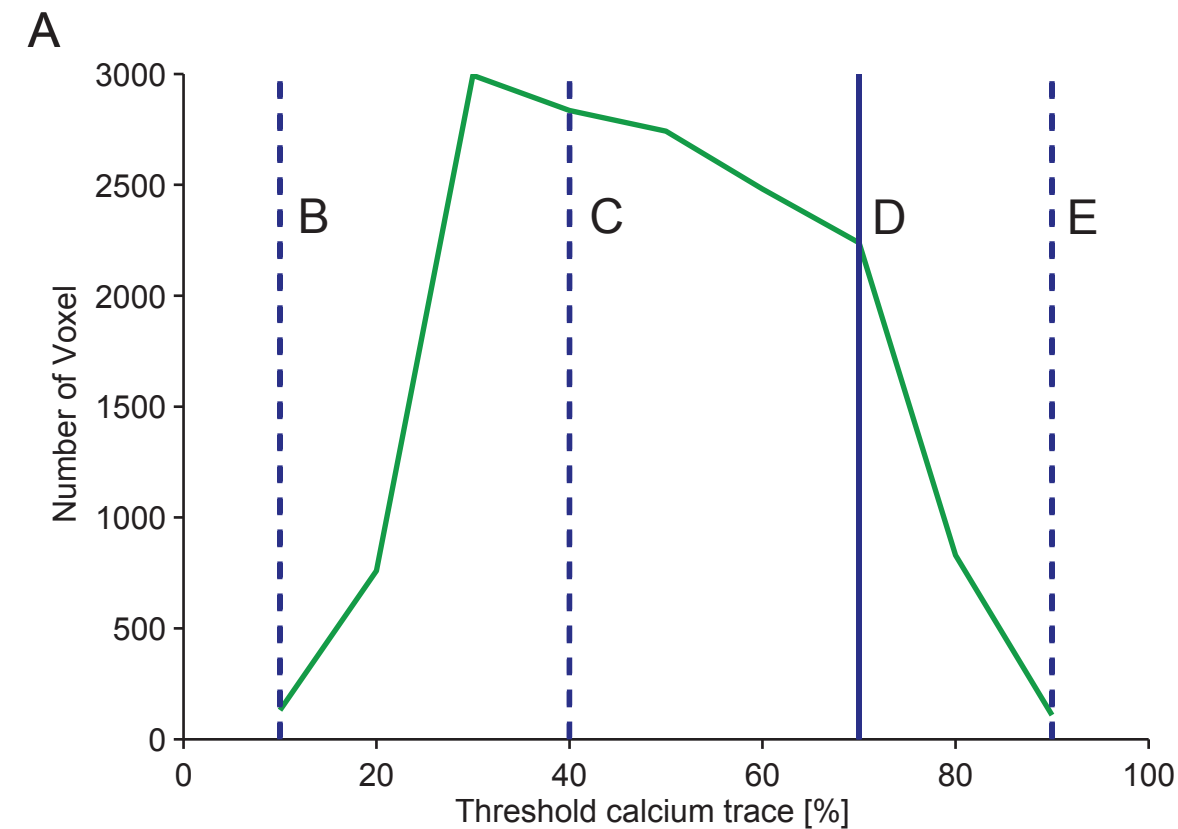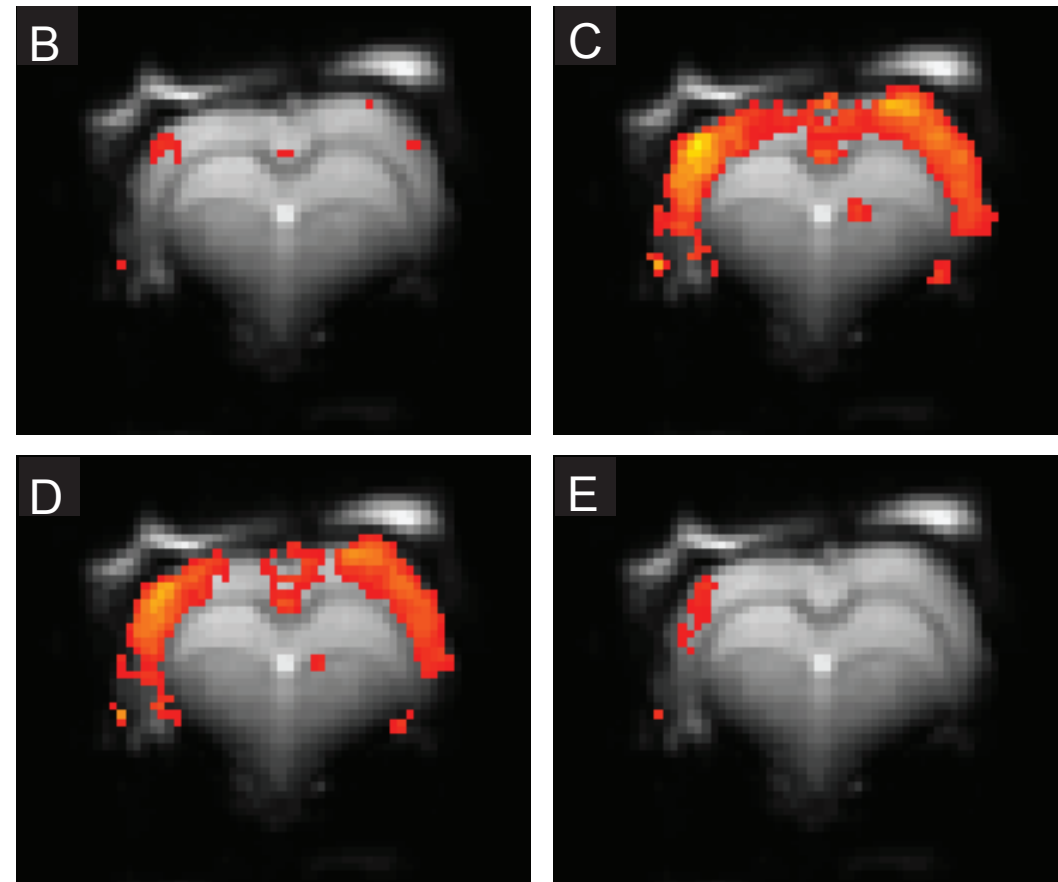

**Figure 2 Supplement 2. Number of active voxel depends on the threshold for calcium wave detection.** (A) Graph depicting the relation of active voxel revealed by a SPM fMRI analysis and varying thresholds for the detection of the calcium waves. (B-E) Activation maps at 10 %, 40 %, 70 % and 90 % threshold in the same animal (C2).
