# Supplementary material for: Cortex-wide BOLD fMRI activity reflects locally-recorded slow oscillation-associated calcium waves
Source: eLife journal article supplement (doi:10.7554/elife.27602), 2017-09-15
Supplement: supp [file elife_poa_e27602_Figure_2_Supplement_3.pdf › elife_poa_e27602_Figure_2_Supplement_3.pdf]

Figure 2 Supplement 3

A

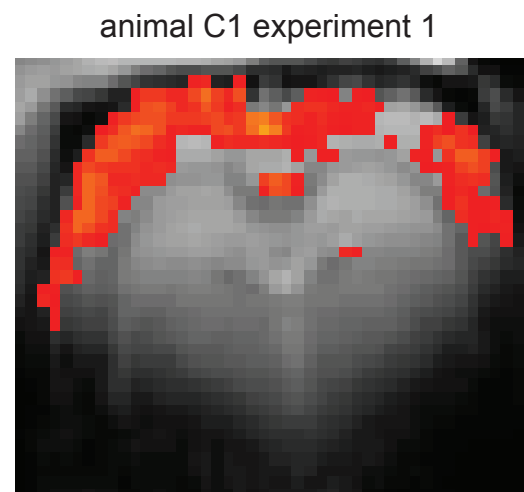

B

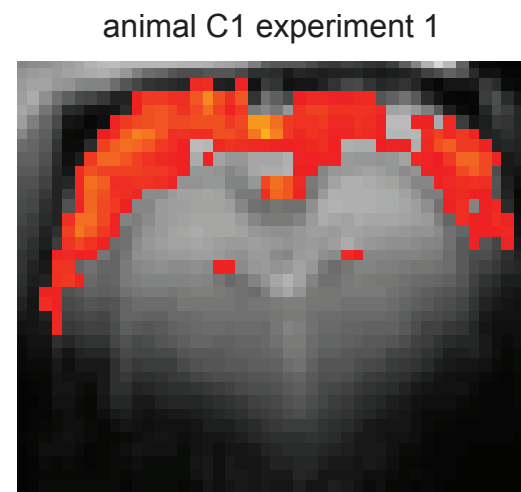

C

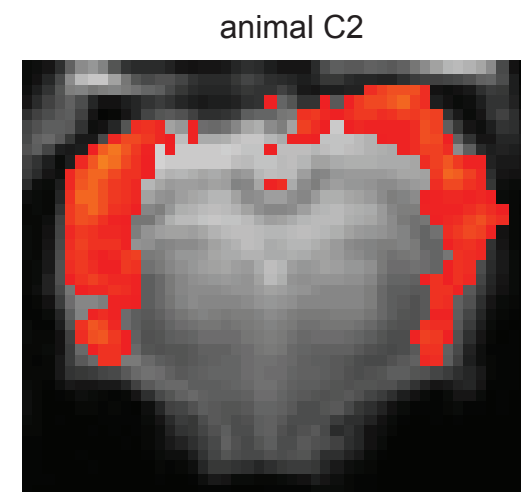

D

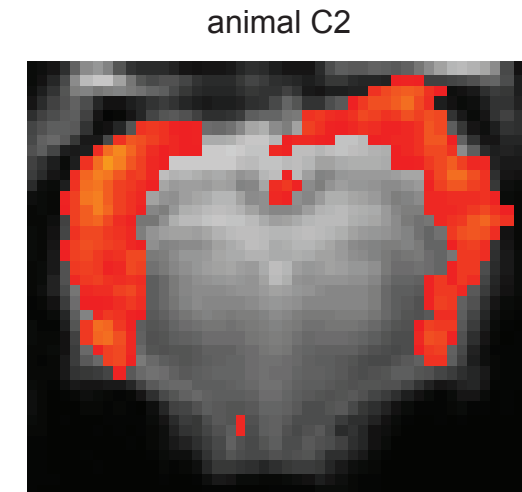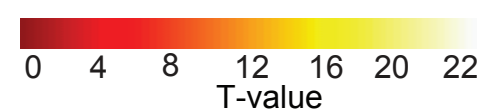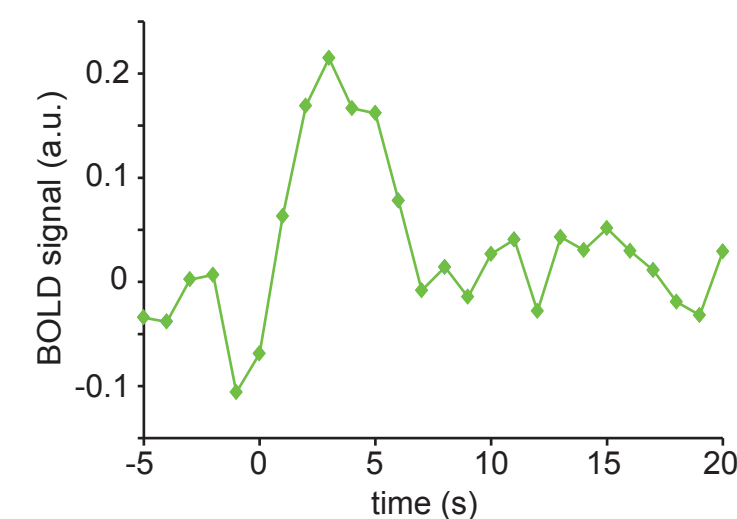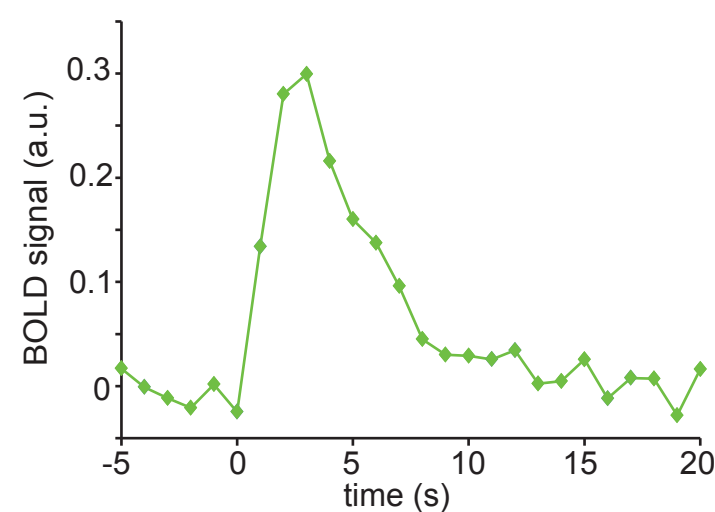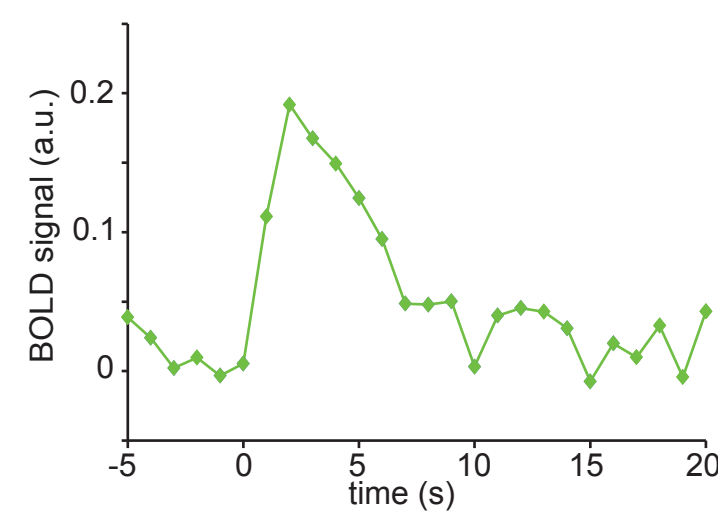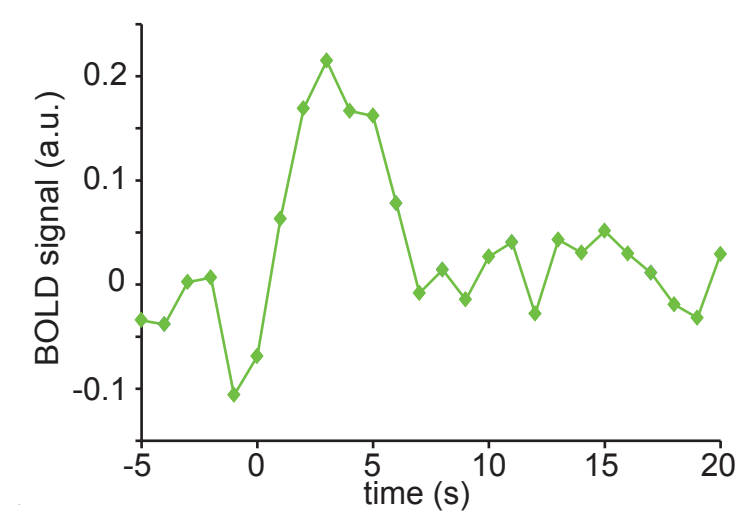

E

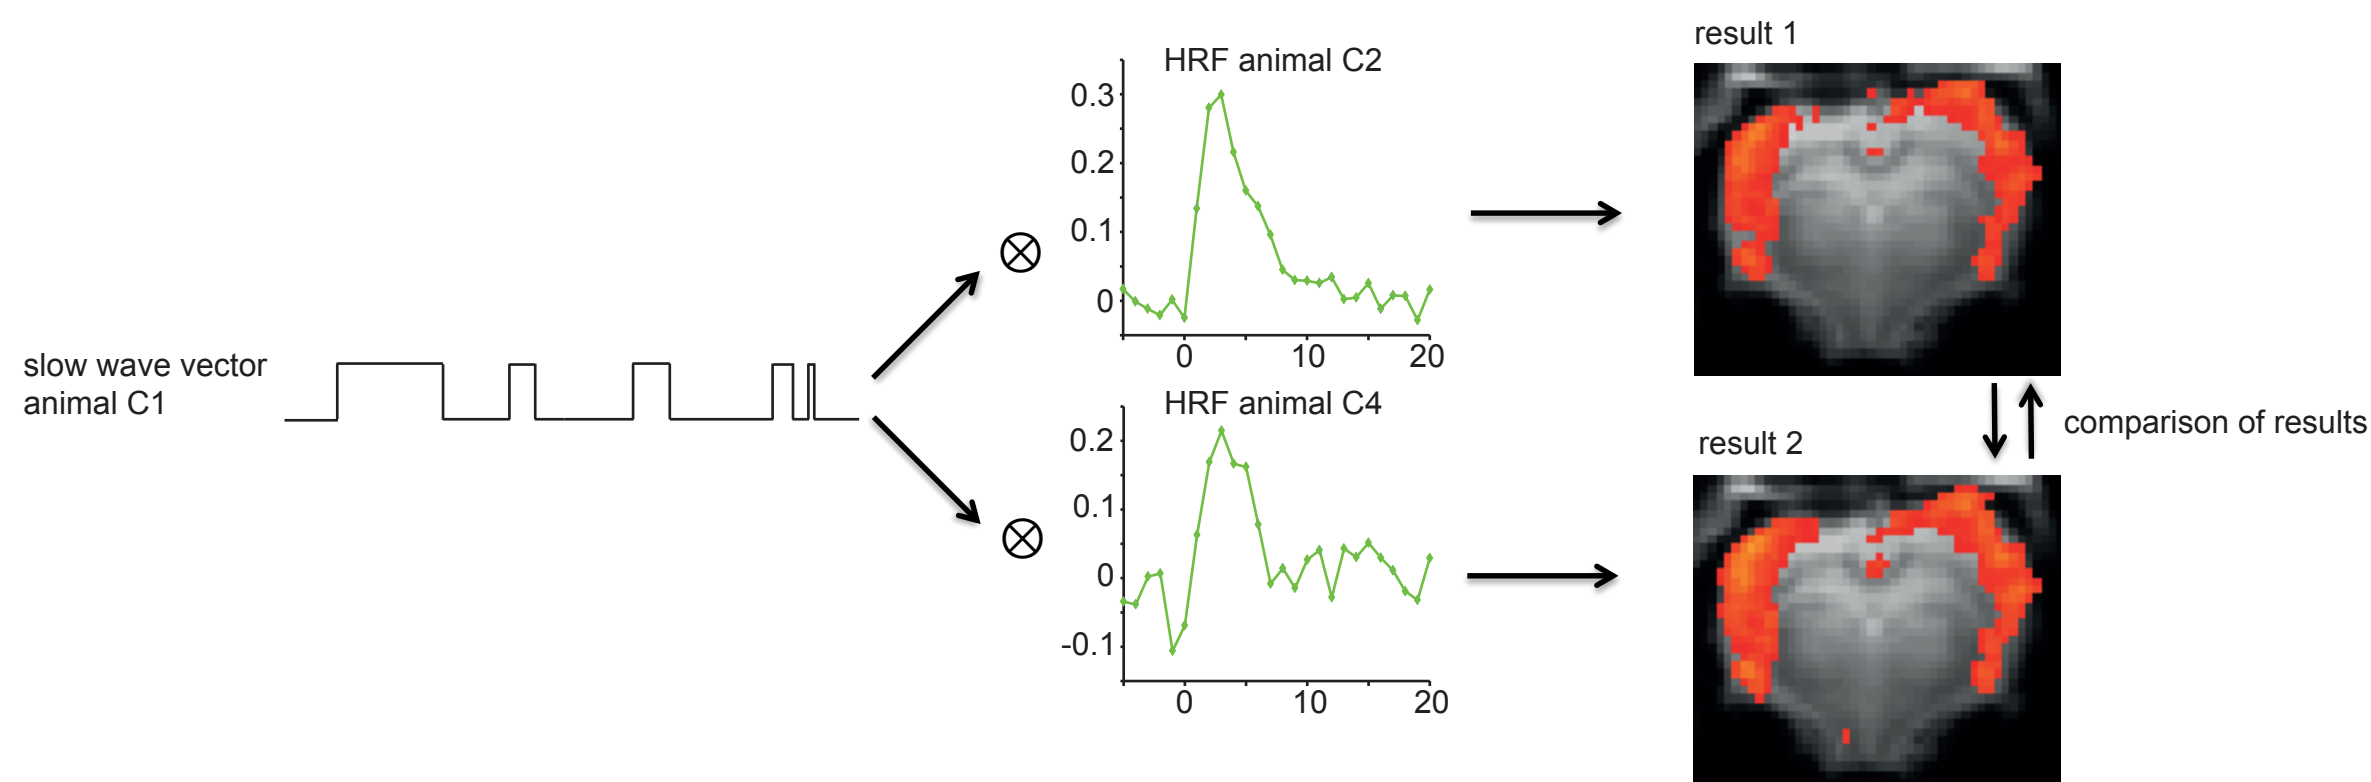

**Figure 2 Supplement 3. Cross-validation procedure to test for impact of respective dataset used for HRF extraction.** (A) Animal C1 experiment 1 analyzed with HRF extracted from animal C4; cluster size = 810, T-value (max.) = 10.86. (B) Same animal as in (A) analyzed with HRF extracted from animal C2; cluster size = 641, T-value (max.) = 11.36. (C) Animal 2 analyzed with HRF extracted from animal C1 (average of both experiments); cluster size = 1492, T-value (max.) = 13.16. (D) Same animal as in (C) analyzed with HRF extracted from animal C4; cluster size = 1912, T-value (max.) = 13.95. (E) Flow chart depicting cross-validation procedure.
