# Supplementary material for: Cortex-wide BOLD fMRI activity reflects locally-recorded slow oscillation-associated calcium waves
Source: eLife journal article supplement (doi:10.7554/elife.27602), 2017-09-15
Supplement: supp [file elife_poa_e27602_Figure_3_Supplement_1.pdf › elife_poa_e27602_Figure_3_Supplement_1.pdf]

Figure 3 Supplement 1

A

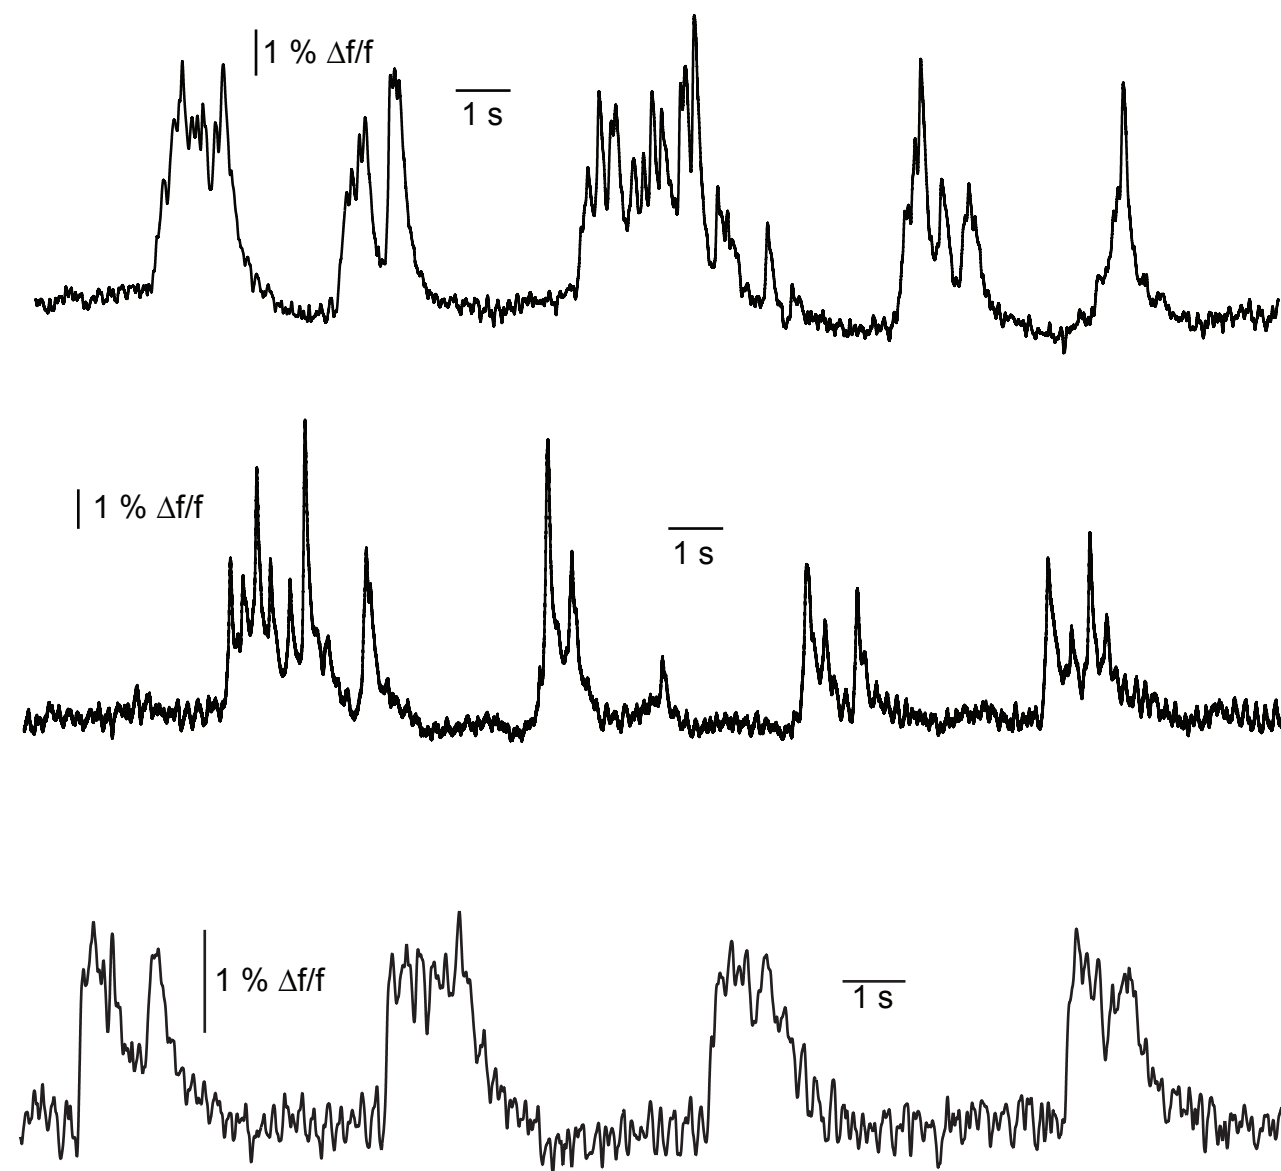

B

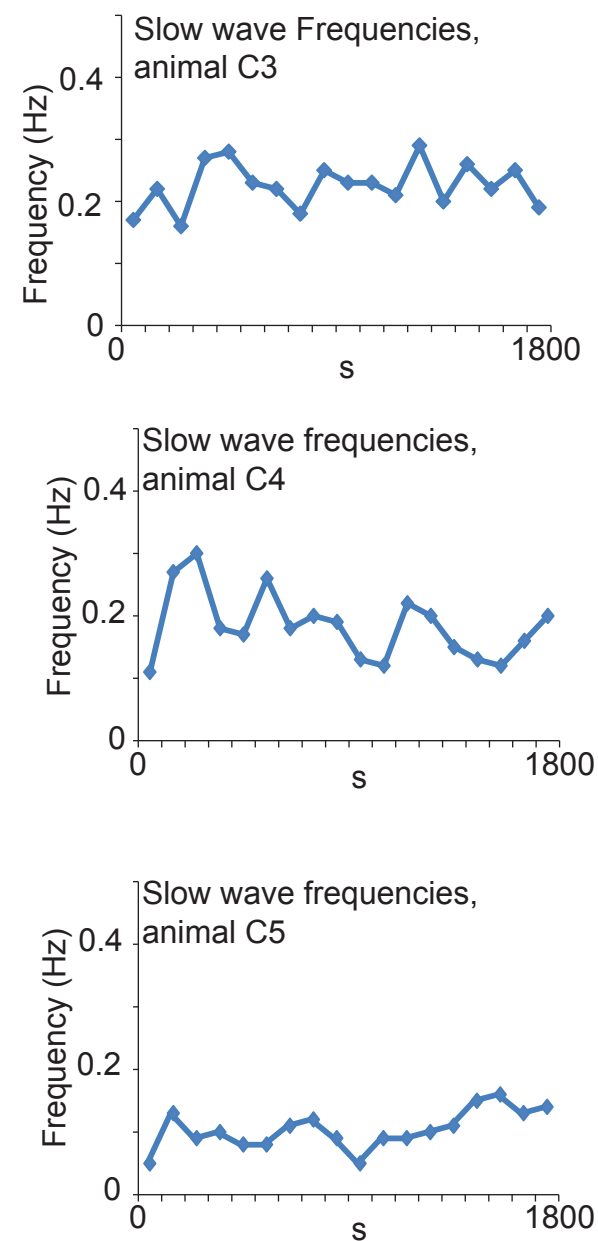

C

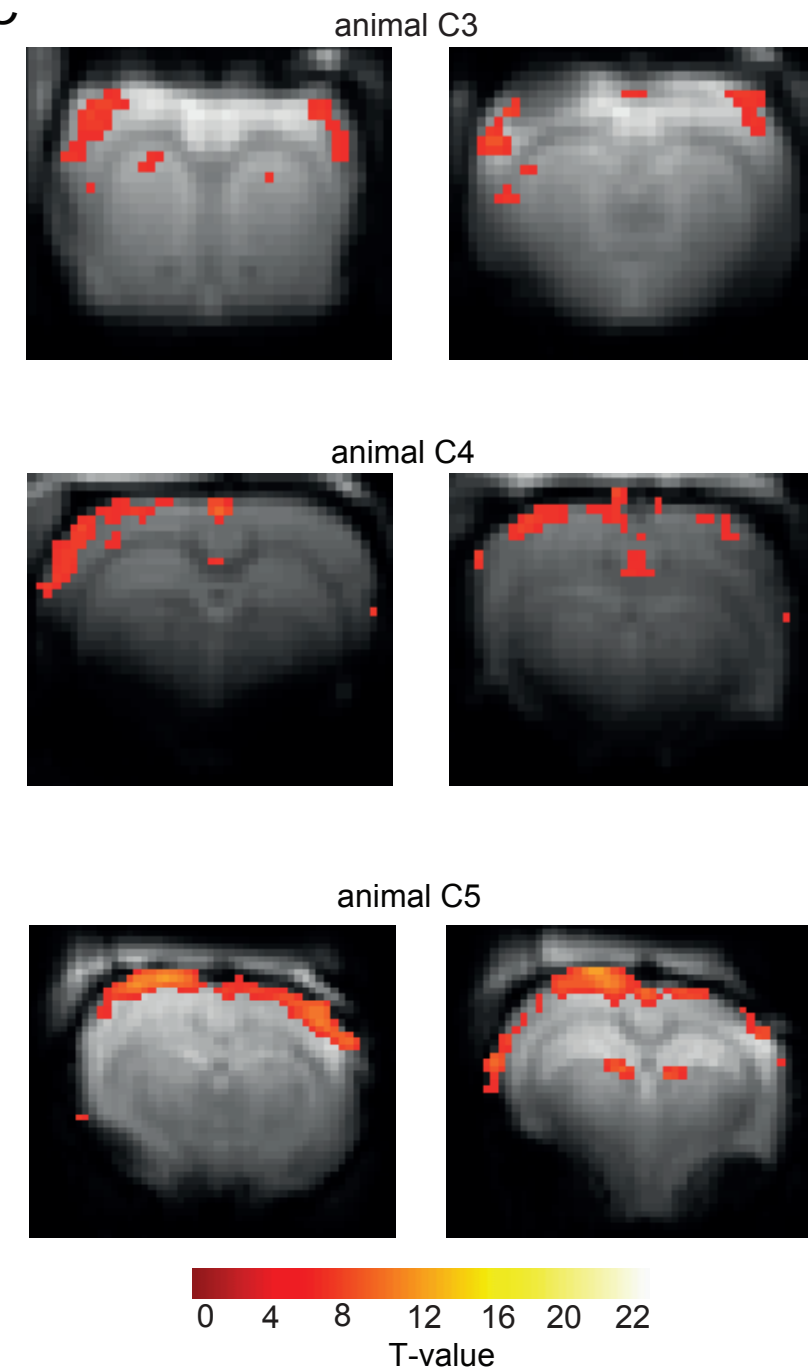

**Figure 3 Supplement 1. BOLD correlate upon FIR-based event-related fMRI analysis of additional datasets.** (A) Excerpts of calcium traces acquired during fMRI measurements depicting slow calcium waves. (B) Frequencies of slow calcium waves within an imaging experiment. (C) Corresponding BOLD correlates upon slow calcium wave events.
