# Supplementary material for: Cortex-wide BOLD fMRI activity reflects locally-recorded slow oscillation-associated calcium waves
Source: eLife journal article supplement (doi:10.7554/elife.27602), 2017-09-15
Supplement: supp [file elife_poa_e27602_Figure_3_Supplement_2.pdf › elife_poa_e27602_Figure_3_Supplement_2.pdf]

Figure 3 Supplement 2

A

experimental HRF

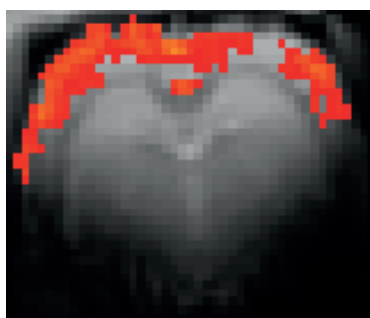

animal C1  
experiment 1

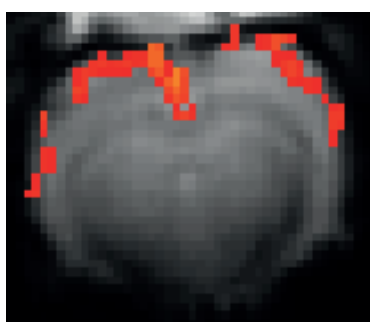

animal C1  
experiment 2

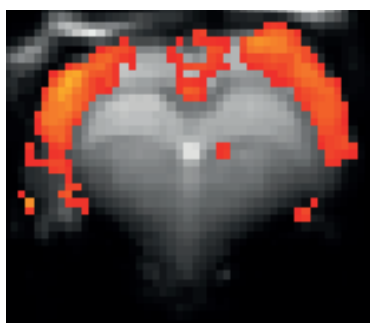

animal C2

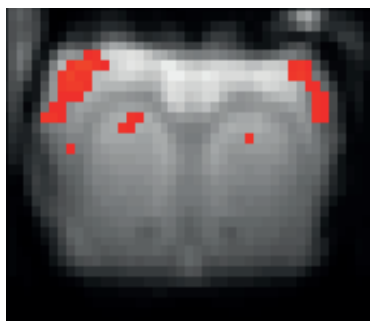

animal C3

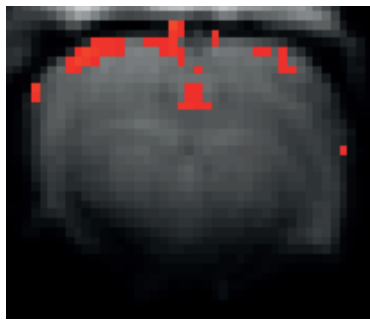

animal C4

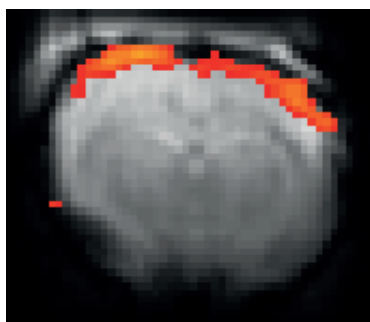

animal C5

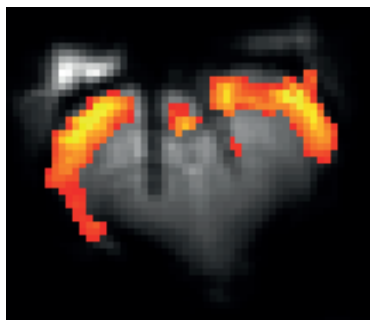

animal T1

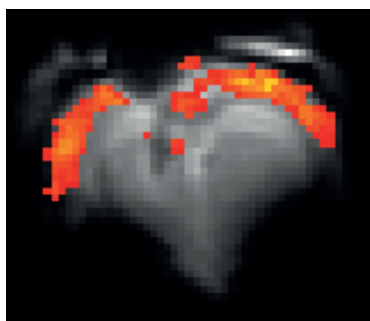

animal T2

B

canonical HRF

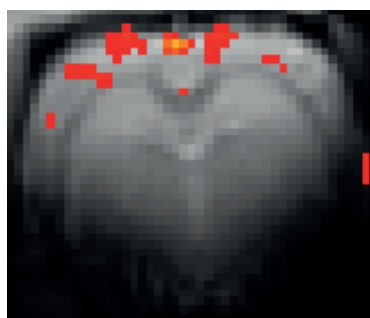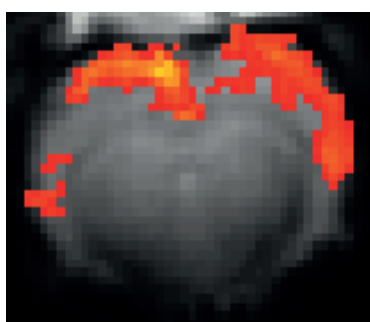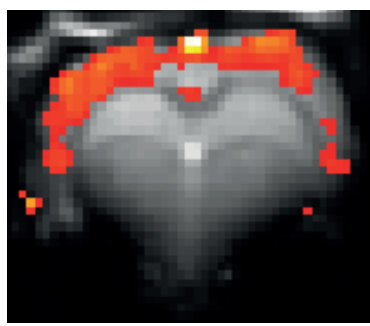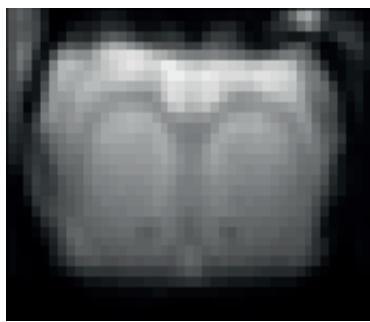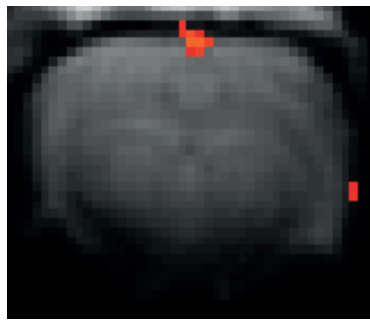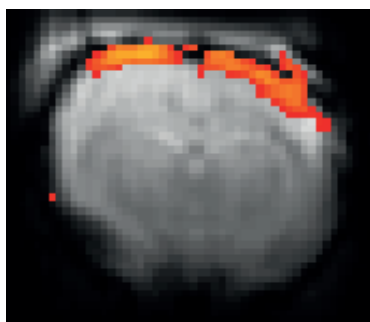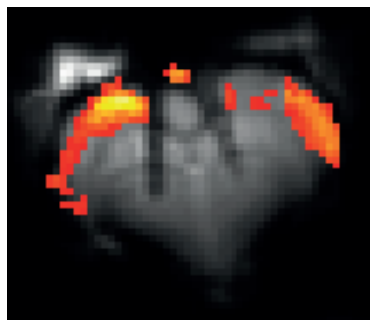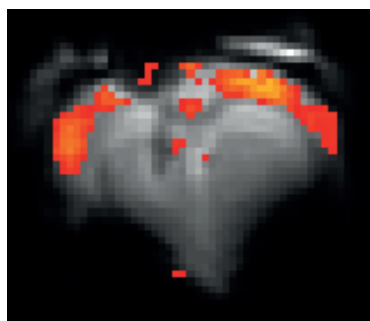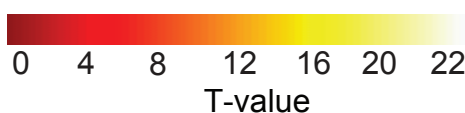

T-value

**Figure 3 Supplement 2. Similar activity patterns upon employing HRFs extracted from datasets based on FIR approach and classical canonical HRF model.** All activation maps were scaled to the overall maximum detected T-value (note that this maximum T-value in animal C2 (B) is only achieved because of spurious activity in the sinus vein detected by the canonical HRF approach). (A) Activation maps resulting from FIR-based event-related fMRI analysis of datasets shown in Figure 4, Figure 4 Supplement 1 and Figure 5. (B) Activation maps resulting from event-related fMRI analysis of the same datasets while using the standard canonical HRF implemented in SPM, which is modelled by two gamma functions.
