# Supplementary material for: Cortex-wide BOLD fMRI activity reflects locally-recorded slow oscillation-associated calcium waves
Source: eLife journal article supplement (doi:10.7554/elife.27602), 2017-09-15
Supplement: supp [file elife_poa_e27602_Figure_3_Supplement_3.pdf › elife_poa_e27602_Figure_3_Supplement_3.pdf]

Figure 3 Supplement 3

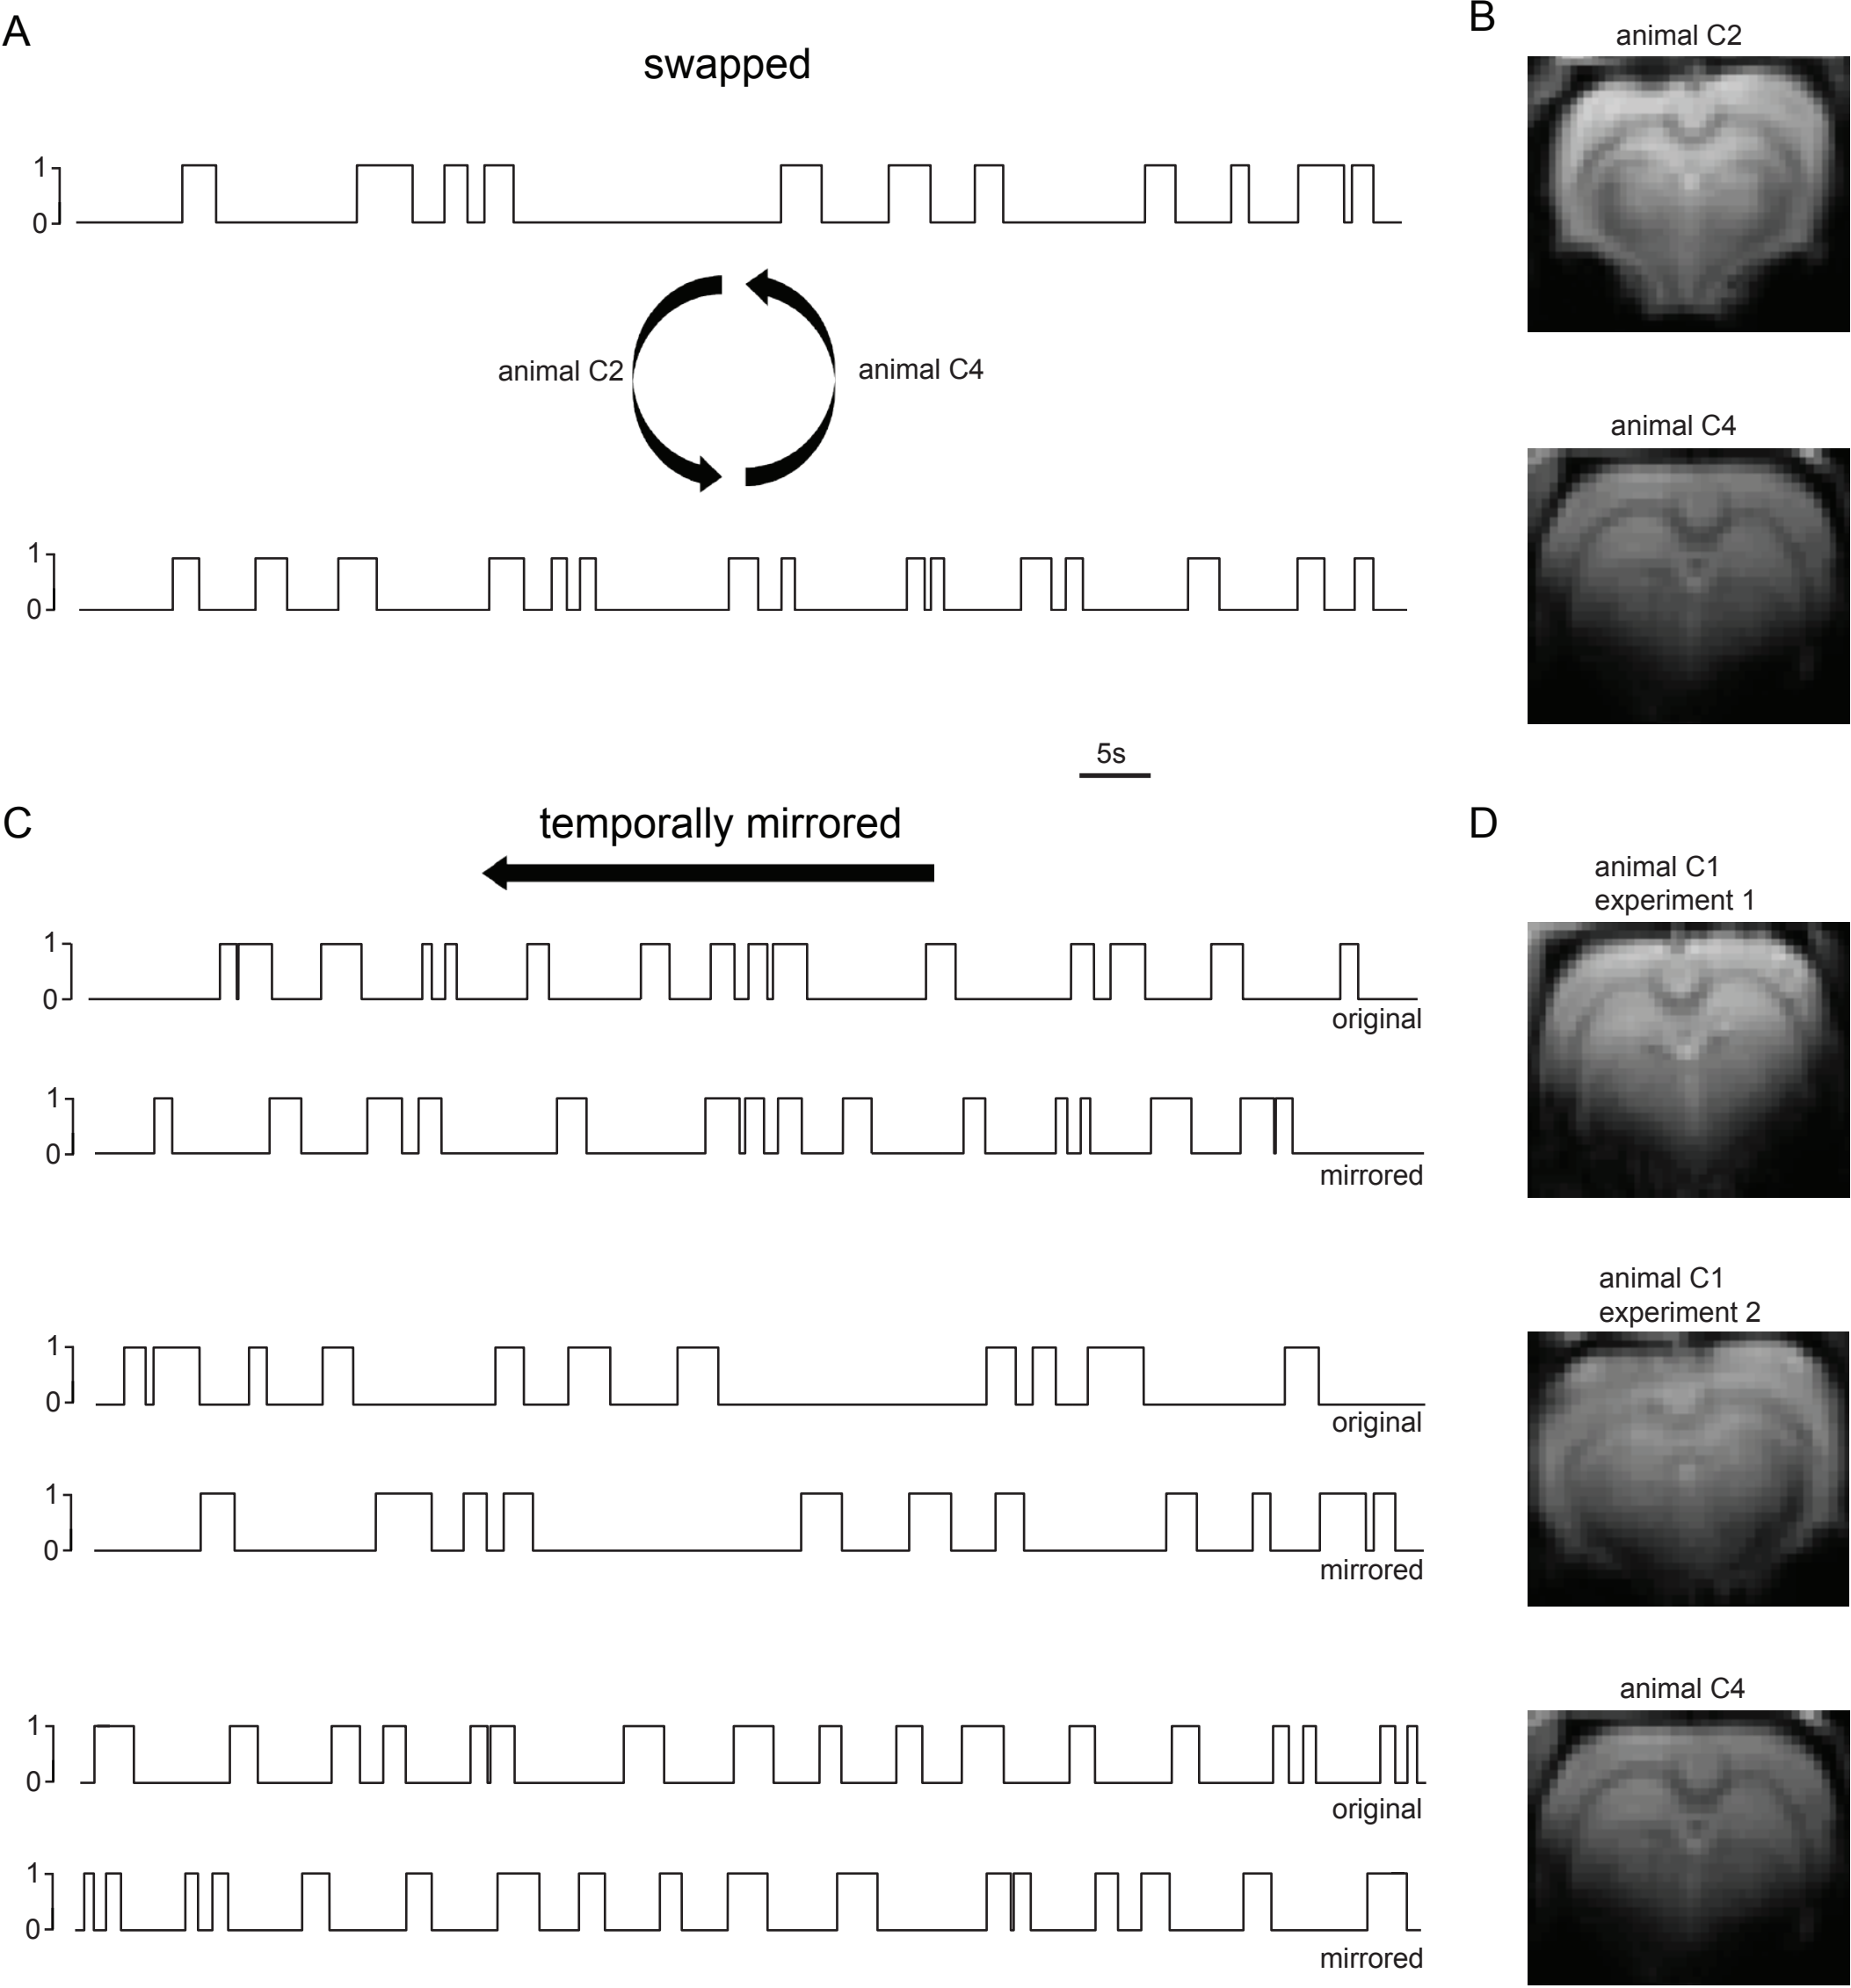

**Figure 3 Supplement 3. Slow wave BOLD correlates depend on precise slow calcium wave dynamics detected in individual experiments.** (A, B) Swapping of slow wave vectors between two animals (A) reveals no BOLD activity upon FIR-based event-related fMRI analysis (B). (C, D) Temporally mirroring slow wave vectors within the same experiment (C) again reveals no activation (D).
