# Supplementary material for: Cortex-wide BOLD fMRI activity reflects locally-recorded slow oscillation-associated calcium waves
Source: eLife journal article supplement (doi:10.7554/elife.27602), 2017-09-15
Supplement: supp [file elife_poa_e27602_Figure_5_Supplement_1.pdf › elife_poa_e27602_Figure_5_Supplement_1.pdf]

Figure 5 Supplement 1

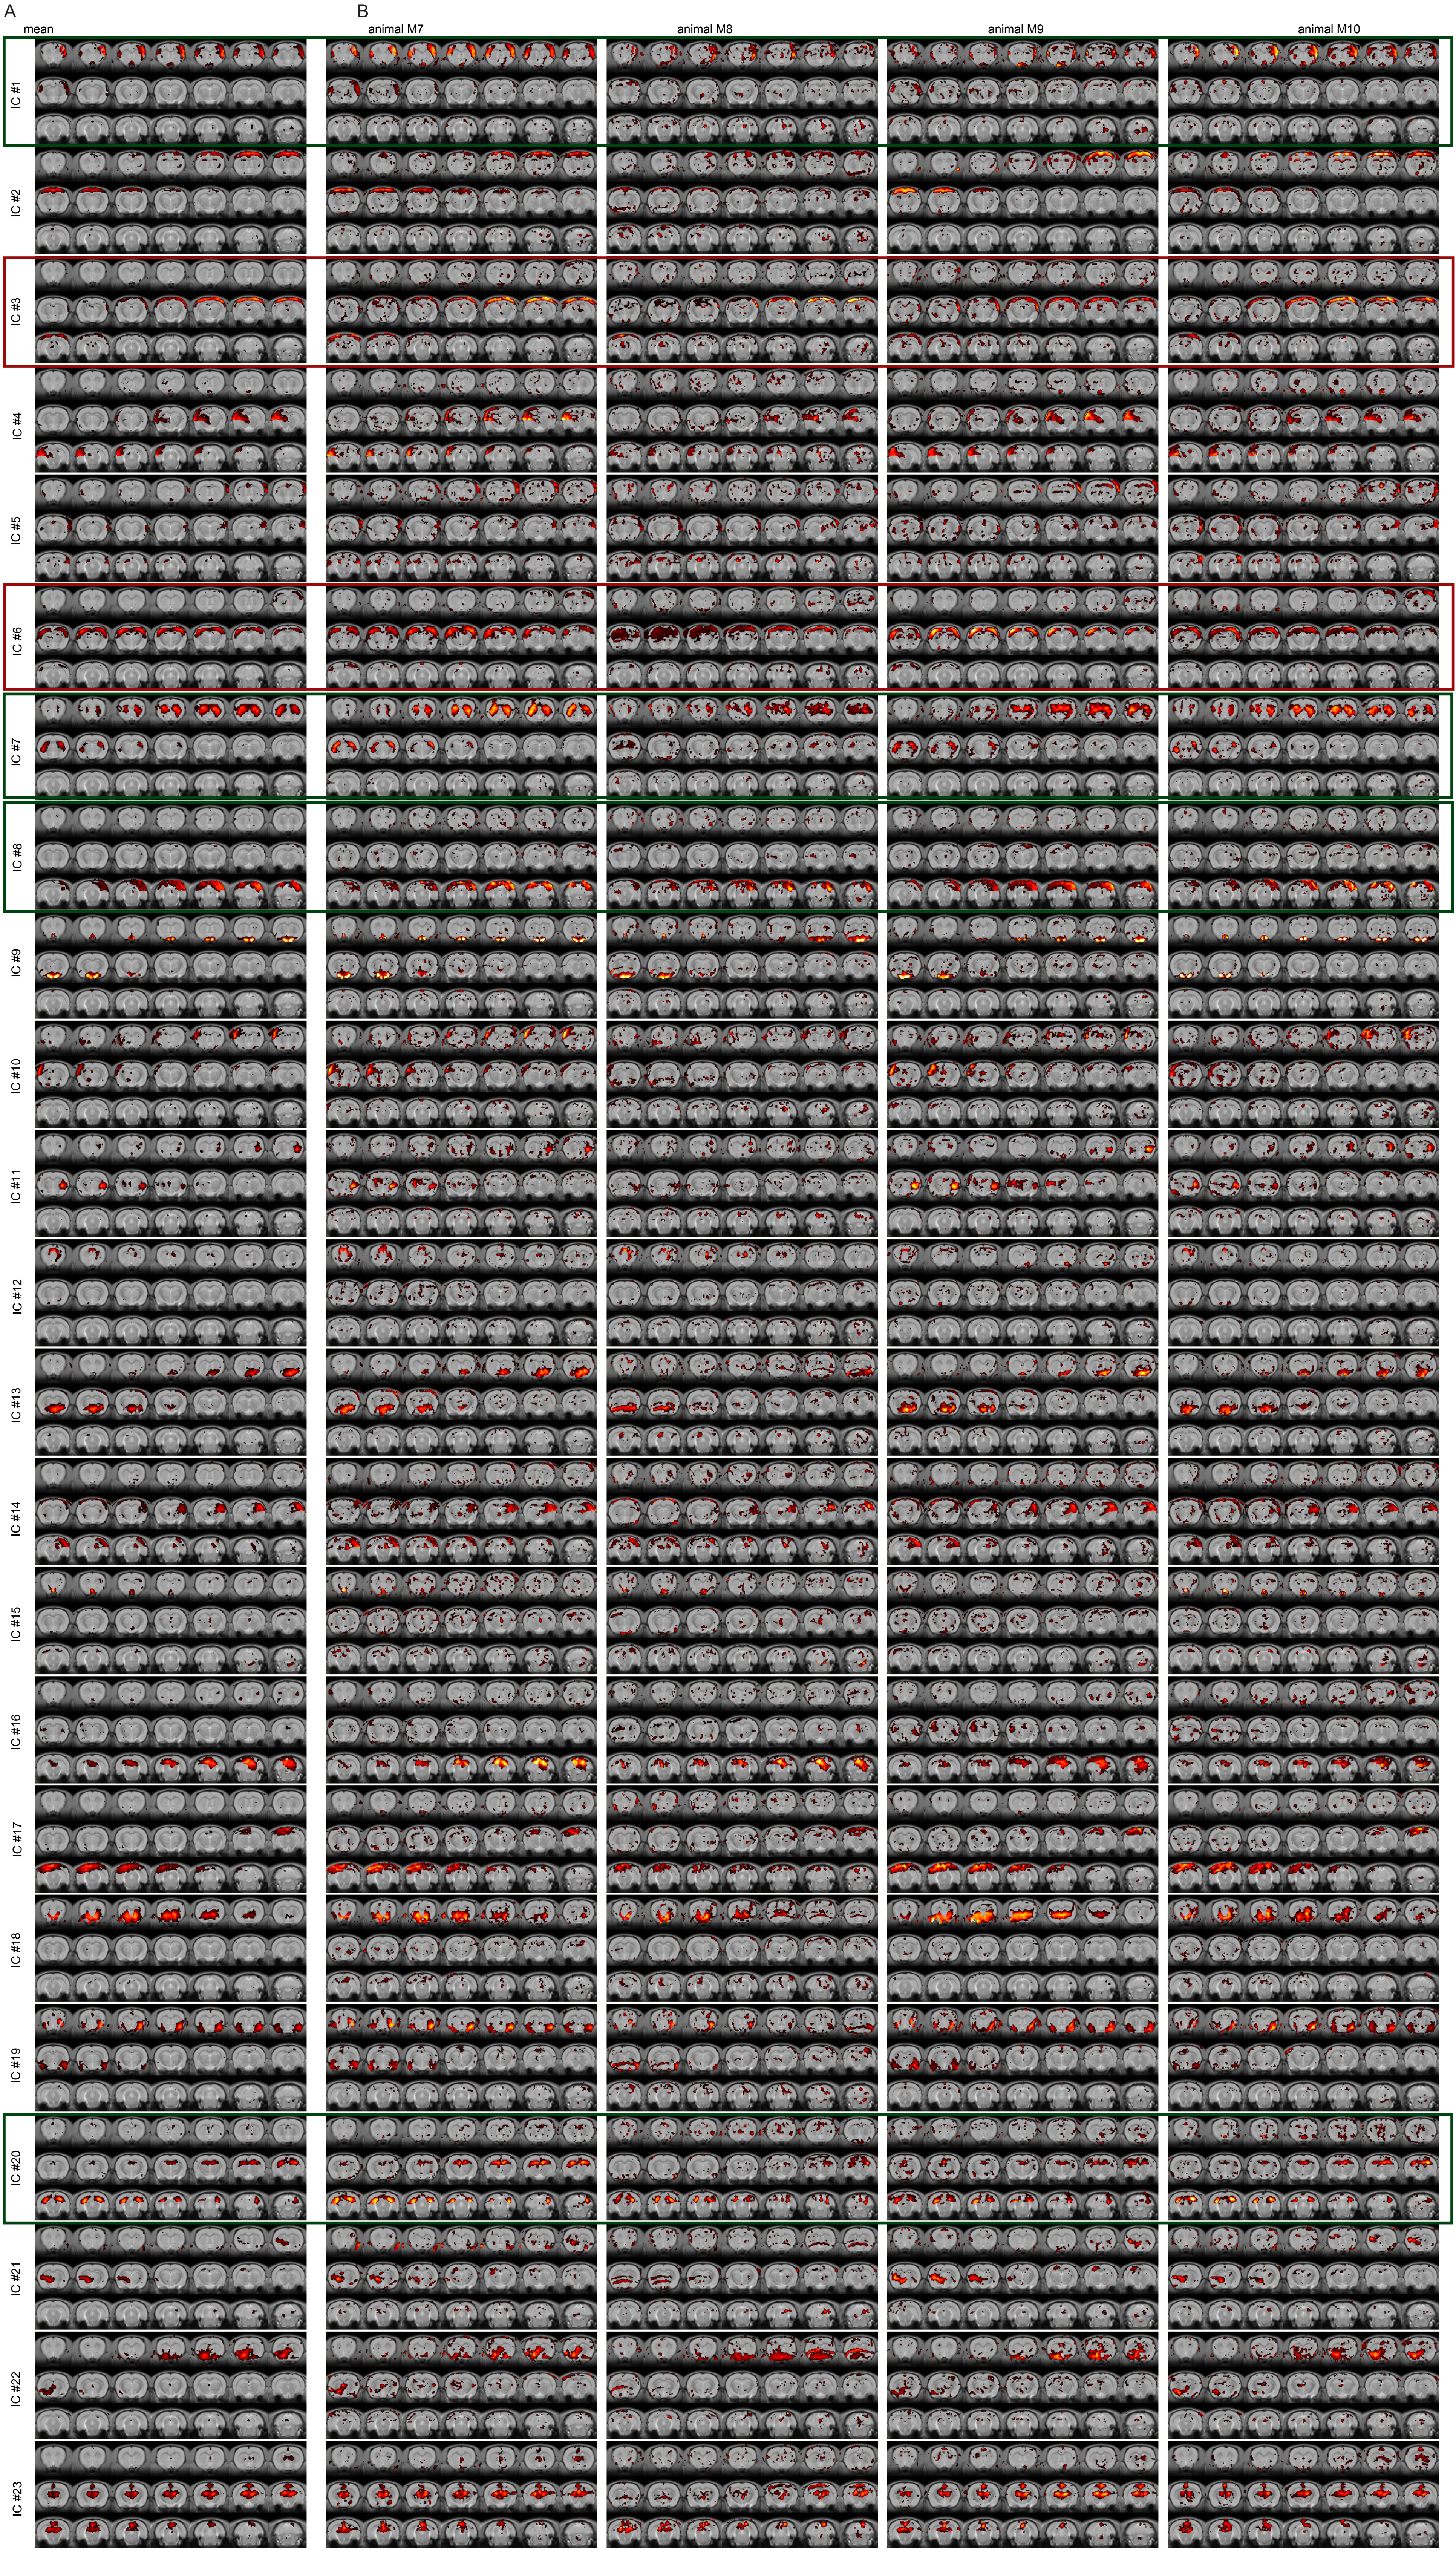

**Figure 5 Supplement 1. Complete component set of IC analysis in slow wave activity.** (A) ICs derived from group ICA (B) corresponding single subject ICs sorted by their mean power in the range up to 0.1 Hz (higher to lower). ICs extracted based on minimum description length criterion (MDL) originally revealed 37 components, after visual inspection all components showing only activity outside the brain were discarded, resulting in a total of 23 components shown on 21 slices with a distance of 0.6 mm between the slices and an isovoxel resolution of 0.3mm<sup>3</sup> after DARTEL normalization and reconstruction. Components #3 and #6 show pancortical activation (outlined in red), components related to typical default mode activity networks including auditory (IC #1) and visual (IC #8) cortex, striatum (IC #7) and hippocampus (IC #20) were also identified (outlined in green).
