# Supplementary material for: Cortex-wide BOLD fMRI activity reflects locally-recorded slow oscillation-associated calcium waves
Source: eLife journal article supplement (doi:10.7554/elife.27602), 2017-09-15
Supplement: supp [file elife_poa_e27602_Figure_5_Supplement_4.pdf › elife_poa_e27602_Figure_5_Supplement_4.pdf]

Figure 5 Supplement 4

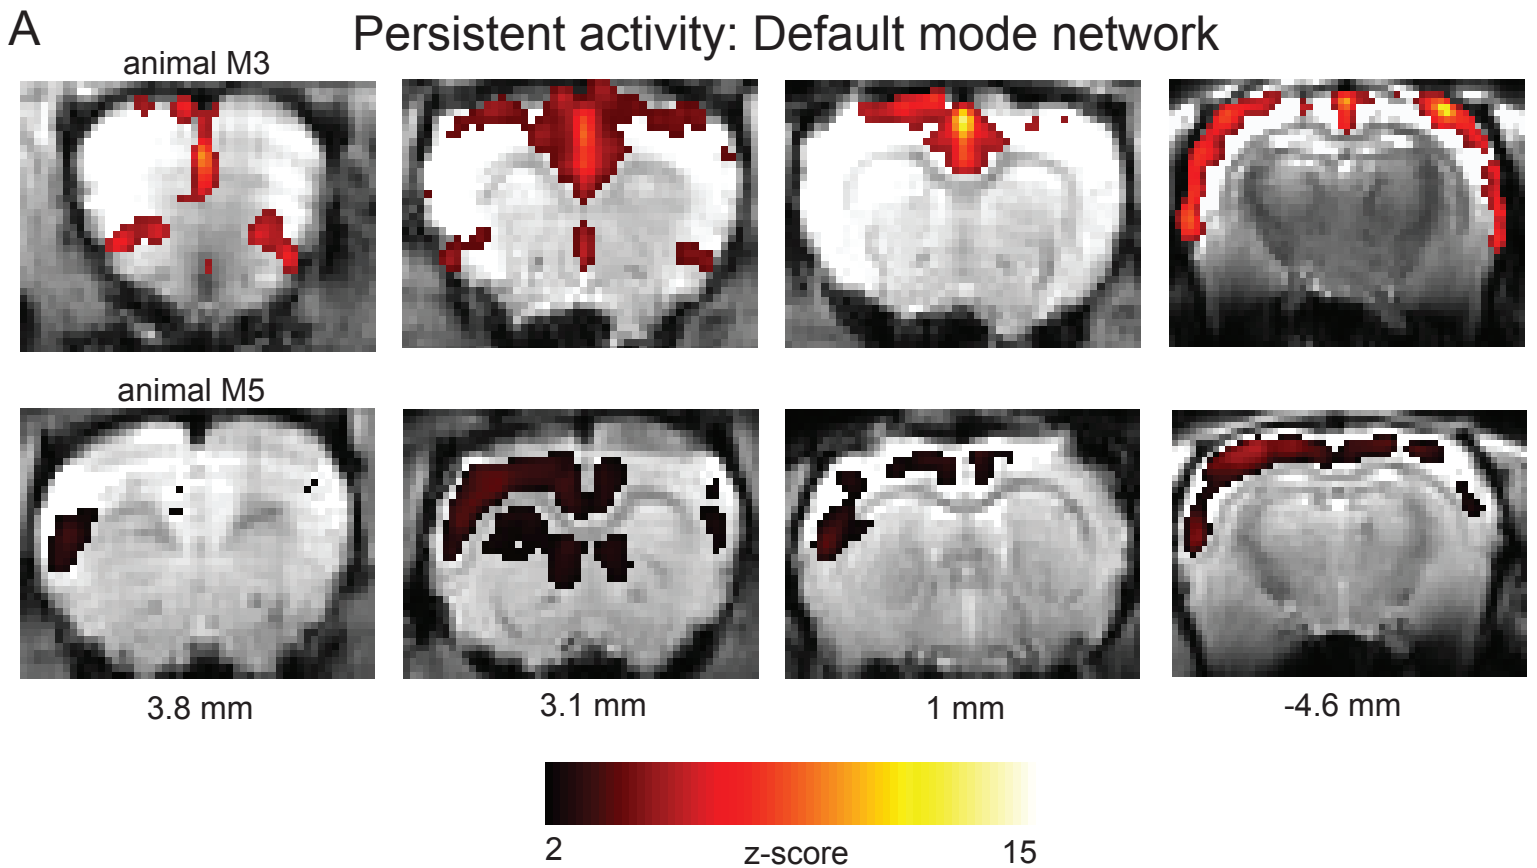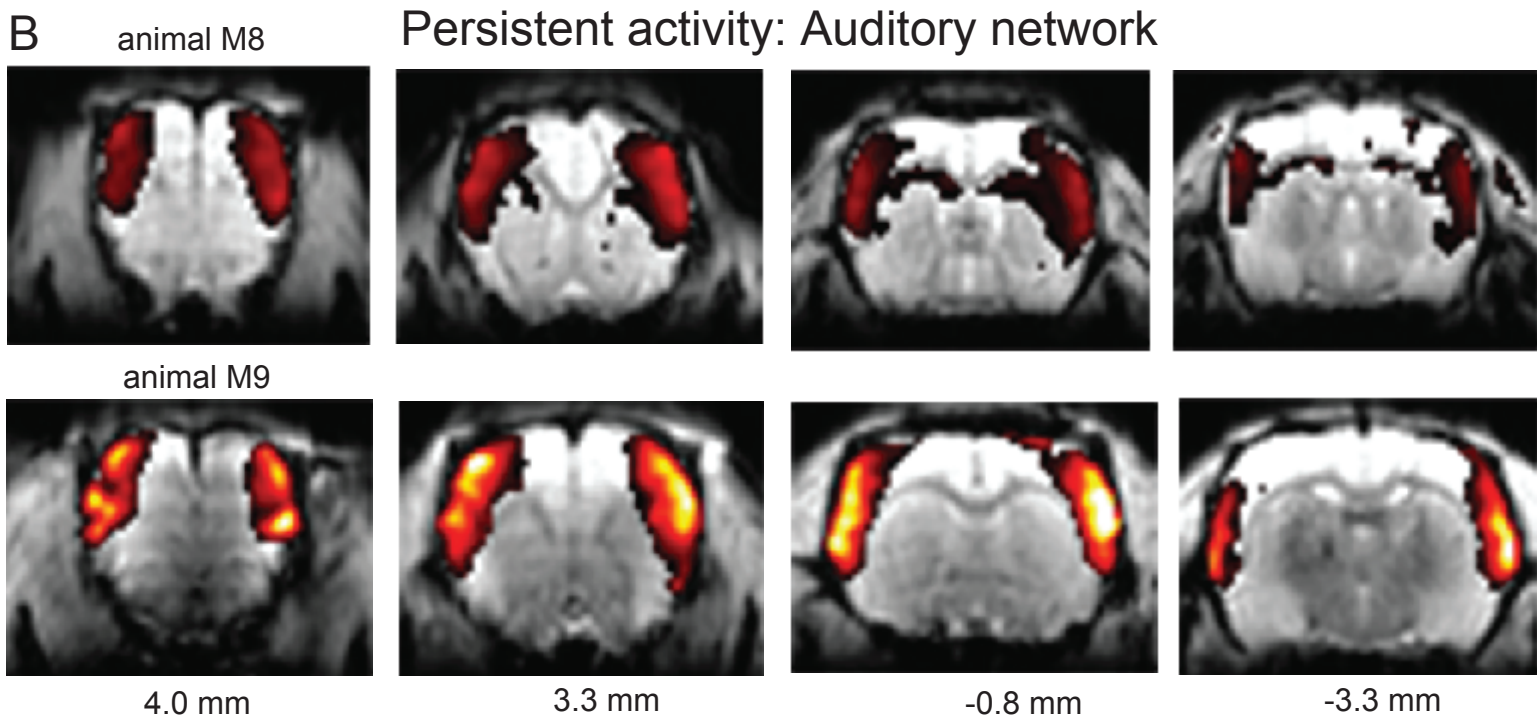

**Figure 5 Supplement 4. IC Analysis showing typical resting state networks during persistent activity.** (A) ICA component showing canonical default mode network activation. The activation maps of two representative animals (out of 4) are depicted (labelled with AP coordinates in mm relative to bregma): At 3.8 mm activation of orbital and prelimbic cortex can be observed, at 3.0 and 1.0 mm cingulate cortex and at 4.6 mm temporal association cortex, posterior parietal cortex and retrosplenial cortex. (B) Auditory cortical network component from the same animals as in (A). This component resembles activation of an auditory network involving sensorimotor (medial superior) and auditory (inferior parietal) cortices.
