# Supplementary material for: Cortex-wide BOLD fMRI activity reflects locally-recorded slow oscillation-associated calcium waves
Source: eLife journal article supplement (doi:10.7554/elife.27602), 2017-09-15
Supplement: supp [file elife_poa_e27602_Figure_6_Supplement_3.pdf › elife_poa_e27602_Figure_6_Supplement_3.pdf]

Figure 6 Supplement 3

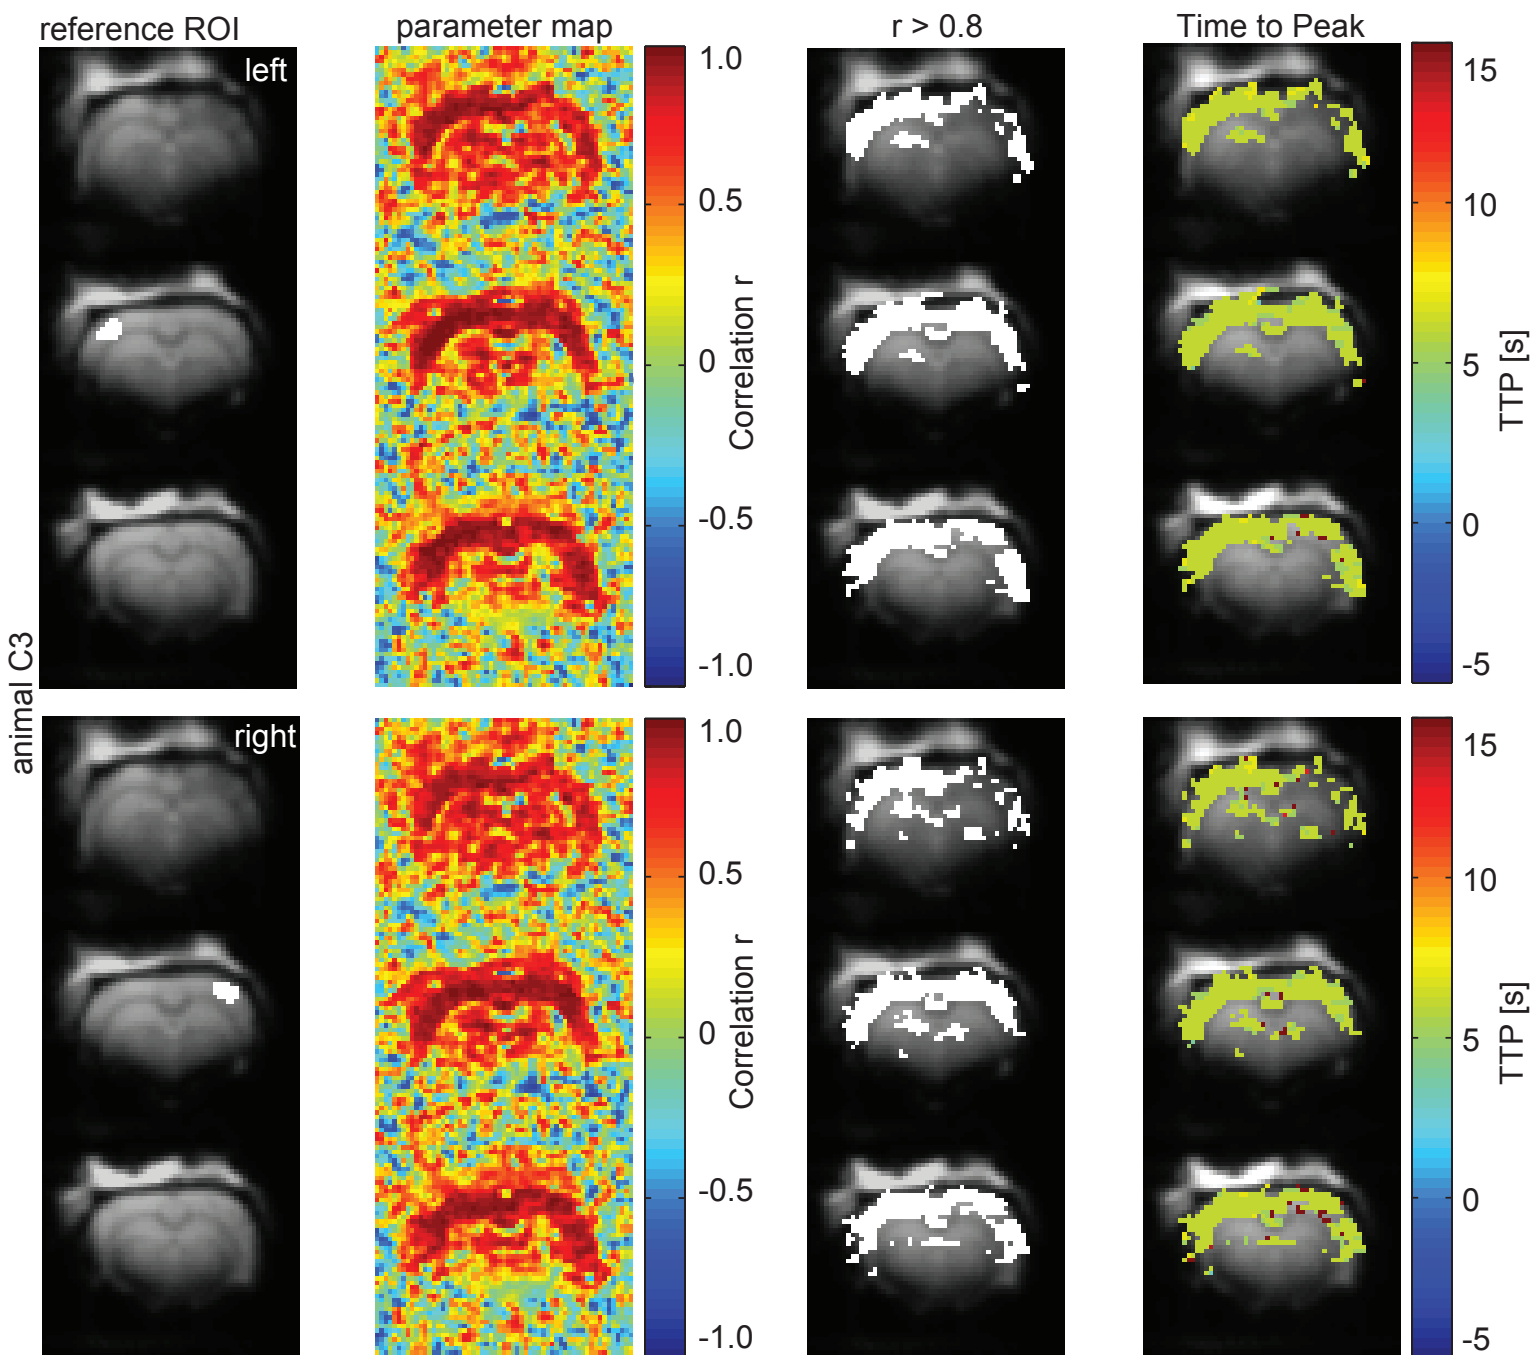

**Figure 6 Supplement 3. Calcium recordings-informed correlation analysis reveals pan-cortical BOLD activation during slow wave activity.** ROIs on both hemispheres (ipsi- and contralateral sites of the fiber recordings), parameter maps showing  $r$ -values and regions of highest correlation ( $r > 0.8$ ; white). The mean HR was calculated from these thresholded regions and time to peak of voxel-by-voxel HR was determined (same analysis as in main Figure 6 C, D in different animal).
