# Supplementary figures and images for: Cortex-wide BOLD fMRI activity reflects locally-recorded slow oscillation-associated calcium waves
Source: eLife journal article supplement (doi:10.7554/elife.27602), 2017-09-15

Figure 5 Supplement 3

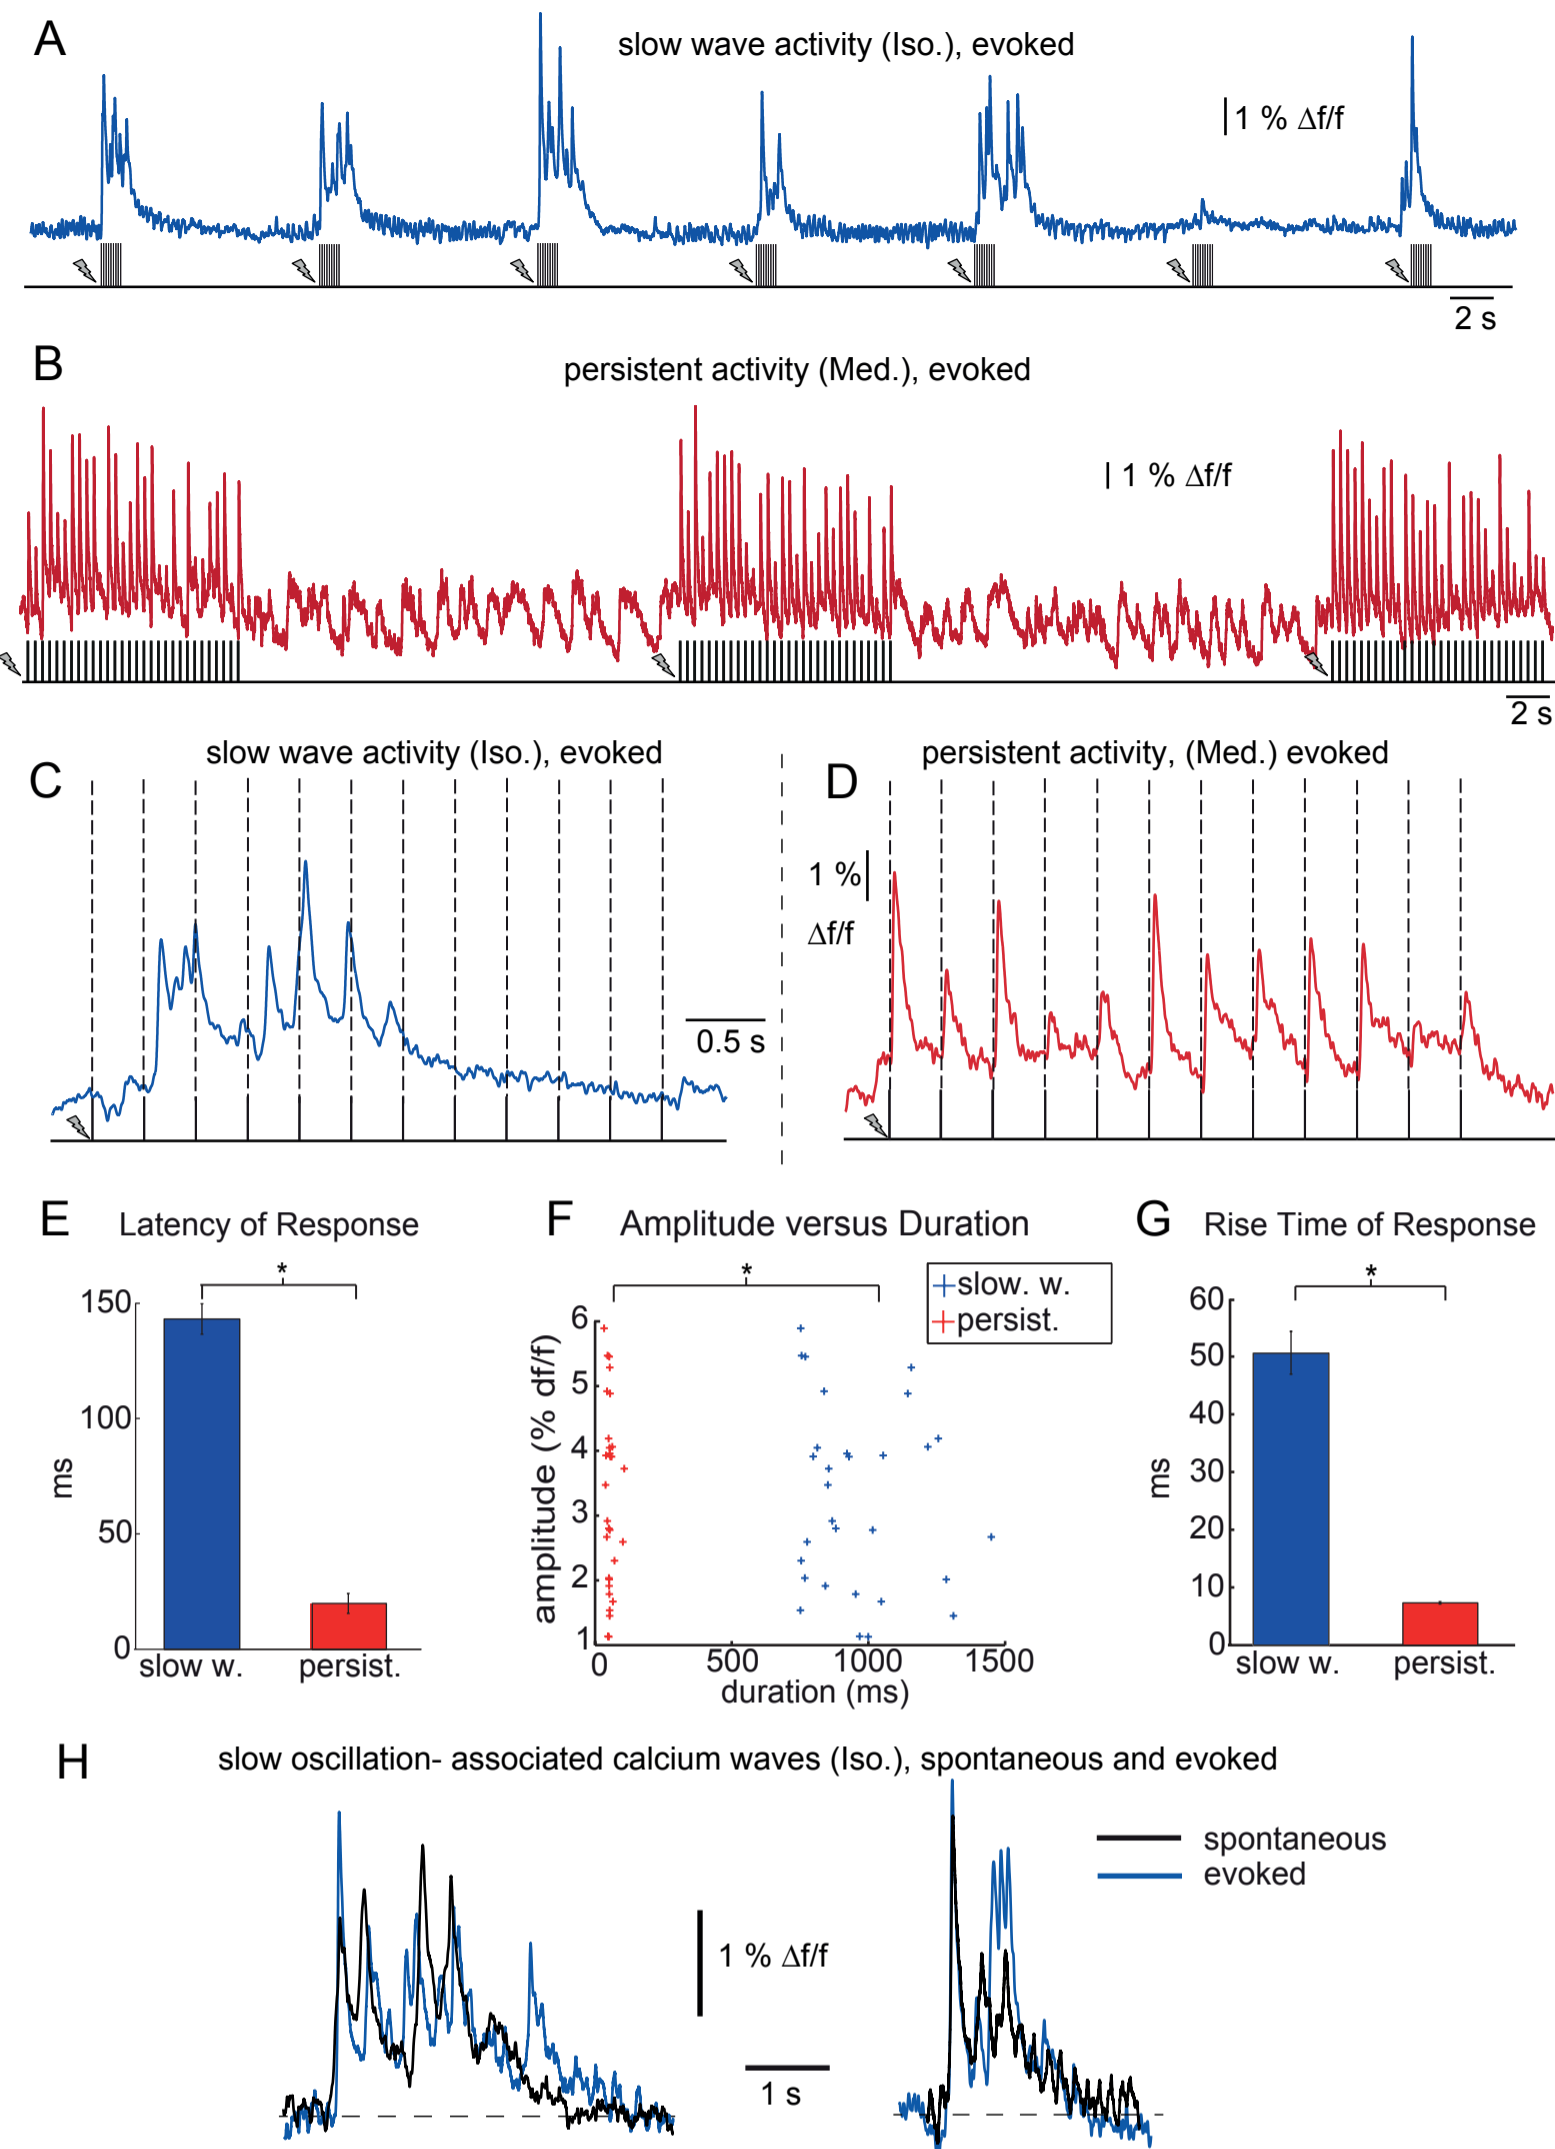

Supplement: supp [file elife-27602-supp-v2.zip › elife_poa_e27602_Figure_5_Supplement_3.pdf]
